# Supplementary material for: Current Research and Development in Hyperthermic Intraperitoneal Chemotherapy (HIPEC)—A Cross-Sectional Analysis of Clinical Trials Registered on ClinicalTrials.gov
Source: MDPI journal article supplement (doi:10.3390/cancers15071926), 2023-03-23
Supplement: s1 [file s1]

## Supplementary Materials - Index

### Supplementary Results

(...) 39 (20%) were completed but had not published results on the primary endpoint (shown in Supplementary Table S1).

*Page 7*

## Supplementary Table

**Table S1.** Characteristics of HIPEC Trials already completed but not yet published results.

| ClinicalTrials.gov<br>Trial ID | Phase     | Treatment<br>allocation | Number of<br>participants | Primary<br>purpose of<br>trial | Condition or disease                                                                                  | Chemotherapy<br>drugs                                                           | Primary Outcome                        |
|--------------------------------|-----------|-------------------------|---------------------------|--------------------------------|-------------------------------------------------------------------------------------------------------|---------------------------------------------------------------------------------|----------------------------------------|
| NCT01226550                    | Phase 1/2 | N/A                     | 18                        | Treatment                      | Colorectal AND Gastric<br>AND Primary peritoneal<br>carcinom                                          | Mitomycin C<br>AND/OR Irinotecan                                                | Safety                                 |
| NCT01126346                    | N/A       | N/A                     | 10                        | Supportive<br>care             | Appendix AND Ovarian<br>AND Colon AND<br>Pseudomyxoma Peritonei<br>AND Primary peritoneal<br>carcinom | N/A                                                                             | Safety                                 |
| NCT02062749                    | Phase 1   | N/A                     | 1                         | Treatment                      | Colorectal cancer                                                                                     | Oxaliplatin                                                                     | Pharmacodynamics<br>/ pharmacokinetics |
| NCT02219893                    | Phase 1/2 | N/A                     | 15                        | Treatment                      | Colorectal cancer                                                                                     | MOC31PE                                                                         | Pharmacodynamics<br>/ pharmacokinetics |
| NCT02830139                    | Phase 2   | Randomized              | 100                       | Treatment                      | Primary peritoneal<br>carcinom AND Ovarian<br>AND Tube carcinoma                                      | Oxaliplatin<br>AND/OR<br>Capecitabine AND<br>Cisplatin AND/OR<br>5-Fluorouracil | Efficacy                               |
| NCT03370588                    | N/A       | Randomized              | 56                        | Supportive<br>Care             | Colorectal cancer                                                                                     | N/A                                                                             | Efficacy                               |
| NCT03561948                    | N/A       | Randomized              | 90                        | Prevention                     | Colorectal cancer                                                                                     | Mitomycin C                                                                     | Feasibility                            |
| NCT01379482                    | Phase 2   | N/A                     | 18                        | Treatment                      | Gastric cancer                                                                                        | Cisplatin AND/OR<br>Doxorubicin                                                 | Efficacy                               |
| NCT02158988                    | Phase 3   | Randomized              | 105                       | Treatment                      | Gastric cancer                                                                                        | Mitomycin C<br>AND/OR Cisplatin                                                 | Efficacy                               |
| NCT02528110                    | Phase 2   | Randomized              | 100                       | Treatment                      | Gastric cancer                                                                                        | Paclitaxel AND/OR<br>5-Fluorouracil                                             | Efficacy                               |
| NCT01854255                    | Phase 2   | N/A                     | 35                        | Treatment                      | Gastric cancer                                                                                        | Doxorubicin AND<br>Cisplatin                                                    | Efficacy                               |
| NCT02903771                    | Phase 1   | N/A                     | 28                        | Treatment                      | Ovarian AND Tube<br>carcinoma                                                                         | Cantrixil                                                                       | Feasibility AND<br>Safety              |
| NCT03931304                    | N/A       | N/A                     | 1200                      | N/A                            | Ovarian cancer                                                                                        | N/A                                                                             | Efficacy                               |
| NCT04234243                    | N/A       | N/A                     | 144                       | N/A                            | Ovarian cancer                                                                                        | N/A                                                                             | Efficacy                               |
| NCT00474669                    | Phase 1   | Non-<br>Randomized      | 30                        | Treatment                      | Ovarian cancer                                                                                        | Docetaxel                                                                       | Pharmacodynamics<br>/ pharmacokinetics |
| NCT00001569                    | Phase 1   | N/A                     | 74                        | Treatment                      | Peritoneal Carcinomatosis<br>from each origine                                                        | Cisplatin AND<br>Paclitaxel AND 5-<br>Fluorouracil                              | Efficacy                               |
| NCT00502177                    | N/A       | N/A                     | 48                        | N/A                            | Peritoneal Carcinomatosis<br>from each origine                                                        | Cisplatin                                                                       | Other                                  |
| NCT01957852                    | N/A       | N/A                     | 86                        | N/A                            | Peritoneal Carcinomatosis<br>from each origine                                                        | N/A                                                                             | Other                                  |
| NCT02082886                    | N/A       | N/A                     | 193                       | N/A                            | Peritoneal Carcinomatosis<br>from each origine                                                        | N/A                                                                             | Efficacy AND<br>Safety                 |
| NCT02189434                    | N/A       | N/A                     | 20                        | N/A                            | Peritoneal Carcinomatosis<br>from each origine                                                        | N/A                                                                             | Other                                  |
| NCT03430128                    | N/A       | Randomized              | 70                        | Supportive<br>Care             | Peritoneal Carcinomatosis<br>from each origine                                                        | N/A                                                                             | Other                                  |
| NCT03956836                    | N/A       | N/A                     | 46                        | N/A                            | Peritoneal Carcinomatosis<br>from each origine                                                        | N/A                                                                             | Other                                  |
| NCT04083547                    | N/A       | N/A                     | 114                       | N/A                            | Peritoneal Carcinomatosis<br>from each origine                                                        | N/A                                                                             | Other                                  |
| NCT04144465                    | N/A       | Randomized              | 30                        | Treatment                      | Peritoneal Carcinomatosis<br>from each origine                                                        | N/A                                                                             | Other                                  |

|             |           |     |     |                 |                                                                     |                                                     |                                     |
|-------------|-----------|-----|-----|-----------------|---------------------------------------------------------------------|-----------------------------------------------------|-------------------------------------|
| NCT04664218 | N/A       | N/A | 50  | Other           | Peritoneal Carcinomatosis from each origine                         | N/A                                                 | Other                               |
| NCT03895606 | N/A       | N/A | 57  | N/A             | Peritoneal Carcinomatosis from each origine                         | N/A                                                 | Other                               |
| NCT04553900 | N/A       | N/A | 28  | Supportive Care | Peritoneal Carcinomatosis from each origine                         | N/A                                                 | Other                               |
| NCT04130347 | N/A       | N/A | 499 | N/A             | Peritoneal Carcinomatosis from each origine                         | N/A                                                 | Other                               |
| NCT00436657 | Phase 1   | N/A | 10  | Treatment       | Peritoneal Carcinomatosis from each origine                         | Cisplatin                                           | Safety                              |
| NCT01812148 | N/A       | N/A | 19  | N/A             | Primary peritoneal carcinom                                         | Oxaliplatin                                         | Efficacy                            |
| NCT02462564 | N/A       | N/A | 31  | N/A             | Primary peritoneal carcinom                                         | N/A                                                 | Other                               |
| NCT02374411 | N/A       | N/A | 55  | N/A             | Primary peritoneal carcinom OR Appendiceal OR Pancreatic            | N/A                                                 | Efficacy                            |
| NCT03034850 | N/A       | N/A | 27  | N/A             | Colorectal OR Gastric OR Ovarian OR Primary peritoneal carcinom     | N/A                                                 | Safety                              |
| NCT02040142 | Phase 2   | N/A | 51  | Treatment       | Colorectal OR Gastric OR Appendiceal OR Primary peritoneal carcinom | Mitomycin C                                         | Safety                              |
| NCT01709487 | Phase 1/2 | N/A | 19  | Treatment       | Primary peritoneal carcinom OR Ovarian OR Tube                      | Cisplatin                                           | Efficacy                            |
| NCT02199171 | Phase 1   | N/A | 30  | Treatment       | Primary peritoneal carcinom OR Ovarian OR Tube                      | Carboplatin                                         | Pharmacodynamics / pharmacokinetics |
| NCT02217956 | Phase 1   | N/A | 30  | Treatment       | Primary peritoneal carcinom OR Ovarian OR Tube                      | Cisplatin                                           | Pharmacodynamics / pharmacokinetics |
| NCT00625092 | Phase 1   | N/A | 17  | Treatment       | Primary peritoneal carcinoma                                        | 5-Fluorouracil AND/OR Leucovorin AND/OR Oxaliplatin | Pharmacodynamics / pharmacokinetics |
| NCT02672865 | Phase 1   | N/A | 4   | Treatment       | Gastric cancer                                                      | Mitomycin C AND Cisplatin                           | Feasibility AND Safety              |

**NR/NA:** not reported or not applicable; **Peritoneal metastases from each origin** (from gastric, colorectal, appendiceal, hepatopancreatic, uterine or ovarian cancers or primary peritoneal tumors). **Other=** Includes lab draws (inflammatory parameters, biomarkers etc.), tumoral biopsy tissus, microbiome, diagnostic test Data gathered on 01.10.2022.
